# Supplementary material
Source: PubMed Central journal article supplement (PMC10986183)
Supplement: NIHMS1950764-supplement-Appendix_Supplementary_Material.pdf [file NIHMS1950764-supplement-Appendix_Supplementary_Material.pdf]

# Phase 1 - Attitudes and Perceptions of Healthcare Providers

Thank you for your interest in this study! The survey will appear on the next page.

The survey will take approximately 20 minutes to complete.

If you are a site lead of a private practice group, please answer this survey on behalf of your practice site.

Thank you very much for your time!

## [INSERT SER LANGUAGE HERE]

Do you wish to proceed to the survey?

- Yes  
 No

By selecting 'yes' you are agreeing to participate in this study.

What is your age?

\_\_\_\_\_

What is your gender?

- Male  
 Female  
 Other

What is your race/ethnicity

- Black/African American  
 Hispanic/Latino  
 Asian/Pacific Islander  
 Native/ American Indian  
 White  
 Other (please specify)

Please Specify:

\_\_\_\_\_

Which best describes your practice environment

- Hospital  
 Primary Care Practice

**Primary Care Providers Survey Questions****Practice Characteristics**

Please choose the following practice type that best describes the practice to which you belong.

- University Affiliated
- Community, with learners
- Community, without learners
- Government clinic

Please select the practice type which most closely represents your clinic

- Pediatrics
- Family and Community Medicine
- Med/Peds
- Other

Please Specify:

\_\_\_\_\_

Our practice site qualifies as a Patient Centered Medical Home

- Yes
- No
- Unsure

Our practice site is staffed by:

- MD/DO only
- MD/DO and Advanced Practice Providers

Which of the following best describes your training.

- MD
- DO
- CRNP
- PA
- Social worker/care coordinator

Please estimate the total number of full and part-time providers within your practice.

- 1-5
- 6-10
- 11-15
- 16-20
- >20

Please estimate the travel time your clinic is from Penn State Children's Hospital.

- Less than 20 minutes
- 21-40 minutes
- 41-60 minutes
- Greater 60 minutes

Please estimate the number of years you have been in clinical practice.

\_\_\_\_\_

### Primary Care Providers Attitudes of Communication and Access

|                                                                                                                                                           | Strongly Agree        | Agree                 | Disagree              | Strongly Disagree     |                       |
|-----------------------------------------------------------------------------------------------------------------------------------------------------------|-----------------------|-----------------------|-----------------------|-----------------------|-----------------------|
| I receive/have access to the majority of hospital/ED discharge summaries within 1 week of patient discharge from the hospital.                            | <input type="radio"/> | <input type="radio"/> | <input type="radio"/> | <input type="radio"/> |                       |
| My clinic has the capability to see pediatric patients within 7 days of hospital/ED discharge                                                             | <input type="radio"/> | <input type="radio"/> | <input type="radio"/> | <input type="radio"/> |                       |
| My clinic has the capability to see pediatric patients within 14 days of hospital/ED discharge                                                            | <input type="radio"/> | <input type="radio"/> | <input type="radio"/> | <input type="radio"/> |                       |
| I have reliable access to hospital records, studies, necessary for me to make medical decisions to manage a patient recently discharged from the hospital | <input type="radio"/> | <input type="radio"/> | <input type="radio"/> | <input type="radio"/> |                       |
| I believe my clinic template gives me adequate time to manage recently discharged patients.                                                               | <input type="radio"/> | <input type="radio"/> | <input type="radio"/> | <input type="radio"/> |                       |
| Our practice has adequate social work and care coordination resources necessary to help patients bridge their hospital care.                              | <input type="radio"/> | <input type="radio"/> | <input type="radio"/> | <input type="radio"/> |                       |
| I have the access to pediatric subspecialty services I need to provide safe post discharge care.                                                          | <input type="radio"/> | <input type="radio"/> | <input type="radio"/> | <input type="radio"/> |                       |
| I believe families will prefer Telehealth follow-up visits as compared to in-person follow-up.                                                            | <input type="radio"/> | <input type="radio"/> | <input type="radio"/> | <input type="radio"/> |                       |
|                                                                                                                                                           | Strongly Agree        | Agree                 | Disagree              | Strongly Disagree     | Unsure                |
| I would feel comfortable managing patients with PICC lines using a Telehealth platform                                                                    | <input type="radio"/> |
| I would feel comfortable managing patients with NGT/NJT using a Telehealth platform                                                                       | <input type="radio"/> |

I would feel comfortable managing patients with supplemental O2 using a Telehealth platform

---

Before the COVID-19 Pandemic, I used Telehealth to provide hospital follow-up care for patient care.

- Always
- Sometimes
- Rarely
- Never

---

I have been using Telehealth for hospital follow-up care during the Pandemic.

- Always
- Sometimes
- Rarely
- Never

---

I plan to continue to use Telehealth for post-discharge care.

- Always
- Sometimes
- Rarely
- Never

### Primary Care Providers Attitudes of Patient Care Responsibilities

|                                                                                                                                                 | Strongly Agree        | Agree                 | Disagree              | Strongly Disagree     |
|-------------------------------------------------------------------------------------------------------------------------------------------------|-----------------------|-----------------------|-----------------------|-----------------------|
| Our practice/providers feel responsible for managing adverse events between hospital discharge and clinic follow up.                            | <input type="radio"/> | <input type="radio"/> | <input type="radio"/> | <input type="radio"/> |
| Our practice/providers feel responsible for addressing the results of labs/studies that are pending at the time of hospital discharge.          | <input type="radio"/> | <input type="radio"/> | <input type="radio"/> | <input type="radio"/> |
| The discharge team is responsible to manage adverse patient events that occur between hospital discharge and PCP follow up.                     | <input type="radio"/> | <input type="radio"/> | <input type="radio"/> | <input type="radio"/> |
| The hospital discharge team is responsible for managing labs/studies that were pending at time of discharge.                                    | <input type="radio"/> | <input type="radio"/> | <input type="radio"/> | <input type="radio"/> |
| A post discharge clinic (PDC) staffed by hospitalists would reduce ED visits that occur due adverse events between discharge and PCP follow up. | <input type="radio"/> | <input type="radio"/> | <input type="radio"/> | <input type="radio"/> |
| PDC staffed by hospitalists would reduce hospital readmissions.                                                                                 | <input type="radio"/> | <input type="radio"/> | <input type="radio"/> | <input type="radio"/> |
| Patients would be satisfied with seeing a hospitalist in a PDC.                                                                                 | <input type="radio"/> | <input type="radio"/> | <input type="radio"/> | <input type="radio"/> |
| PDC might interfere with an established therapeutic relationship between PCP and family/patient.                                                | <input type="radio"/> | <input type="radio"/> | <input type="radio"/> | <input type="radio"/> |
| I would refer to a post discharge clinic to help me manage patients who were recently discharged from the hospital.                             | <input type="radio"/> | <input type="radio"/> | <input type="radio"/> | <input type="radio"/> |

---

|                                                                                                                             | Strongly Agree        | Agree                 | Disagree              | Strongly Disagree                | Unsure                |
|-----------------------------------------------------------------------------------------------------------------------------|-----------------------|-----------------------|-----------------------|----------------------------------|-----------------------|
| I feel comfortable managing complicated patients who were discharged with temporary technology such as PICC lines.          | <input type="radio"/> | <input type="radio"/> | <input type="radio"/> | <input checked="" type="radio"/> | <input type="radio"/> |
| I feel comfortable managing complicated patients who were discharged with temporary technology such as NGT/NJT.             | <input type="radio"/> | <input type="radio"/> | <input type="radio"/> | <input type="radio"/>            | <input type="radio"/> |
| I feel comfortable managing complicated patients who were discharged with temporary technology such as supplemental oxygen. | <input type="radio"/> | <input type="radio"/> | <input type="radio"/> | <input type="radio"/>            | <input type="radio"/> |

---

Please estimate the number of patients you have who were seen in the post discharge care clinic

---

**Hospital-Based Providers survey Questions:****Practice Characteristics**

Please estimate the number of years you have been in clinical practice.

---

Which of the following best describes your clinical background

- MD
- DO
- CRNP
- PA
- Case Manager
- Social Worker

Please indicate which best describes your practice

- Division of Pediatric Hospital Medicine
- Pediatric Hospital Emergency Medicine
- Department of Care Coordination
- Other

If 'other' please specify

---

Please estimate the number of full time and part time providers in your practice

- 1-5
- 6-10
- 11-15
- 16-20
- 20+

### Hospital-Based Providers Attitudes of Communication and Access

|                                                                                                                                                         | Strongly Agree        | Agree                 | Disagree              | Strongly Disagree     |
|---------------------------------------------------------------------------------------------------------------------------------------------------------|-----------------------|-----------------------|-----------------------|-----------------------|
| Primary Care Practices have the capability to see pediatric patients within 7 days of hospital/ED discharge                                             | <input type="radio"/> | <input type="radio"/> | <input type="radio"/> | <input type="radio"/> |
| Does this affect your ability to discharge patients from the hospital?                                                                                  | <input type="radio"/> | <input type="radio"/> | <input type="radio"/> | <input type="radio"/> |
| Primary Care Practices have the capability to see pediatric patients within 14 days of hospital/ED discharge                                            | <input type="radio"/> | <input type="radio"/> | <input type="radio"/> | <input type="radio"/> |
| Primary Care Practices have access to the necessary hospital records to manage a patient recently discharged from the hospital.                         | <input type="radio"/> | <input type="radio"/> | <input type="radio"/> | <input type="radio"/> |
| Primary Care Providers have the time needed to manage recently discharged patients.                                                                     | <input type="radio"/> | <input type="radio"/> | <input type="radio"/> | <input type="radio"/> |
| Primary Care Practices have adequate social work and care coordination resources necessary to bridge hospital care.                                     | <input type="radio"/> | <input type="radio"/> | <input type="radio"/> | <input type="radio"/> |
| Primary Care Practices have timely access to pediatric subspecialty services to assist them in managing patients recently discharged from the hospital. | <input type="radio"/> | <input type="radio"/> | <input type="radio"/> | <input type="radio"/> |
| Telehealth could help improve post discharge care for patients                                                                                          | <input type="radio"/> | <input type="radio"/> | <input type="radio"/> | <input type="radio"/> |
| Telehealth post-discharge care should be performed by the PCP                                                                                           | <input type="radio"/> | <input type="radio"/> | <input type="radio"/> | <input type="radio"/> |
| Families will prefer Telehealth follow-up visits as compared to in-person follow-up.                                                                    | <input type="radio"/> | <input type="radio"/> | <input type="radio"/> | <input type="radio"/> |



|                                                                                             | Strongly Agree        | Agree                 | Disagree              | Strongly Disagree                | Unsure                |
|---------------------------------------------------------------------------------------------|-----------------------|-----------------------|-----------------------|----------------------------------|-----------------------|
| Our team completes the discharge summaries within 3 days of patient discharge               | <input type="radio"/> | <input type="radio"/> | <input type="radio"/> | <input checked="" type="radio"/> | <input type="radio"/> |
| I would feel comfortable managing patients with PICC lines using a Telehealth platform      | <input type="radio"/> | <input type="radio"/> | <input type="radio"/> | <input type="radio"/>            | <input type="radio"/> |
| I would feel comfortable managing patients with NGT/NJT using a Telehealth platform         | <input type="radio"/> | <input type="radio"/> | <input type="radio"/> | <input type="radio"/>            | <input type="radio"/> |
| I would feel comfortable managing patients with supplemental O2 using a Telehealth platform | <input type="radio"/> | <input type="radio"/> | <input type="radio"/> | <input type="radio"/>            | <input type="radio"/> |

### Hospital-Based Providers Attitudes of Patient Care Responsibilities

|                                                                                                                      | Strongly Agree        | Agree                 | Disagree              | Strongly Disagree     |
|----------------------------------------------------------------------------------------------------------------------|-----------------------|-----------------------|-----------------------|-----------------------|
| The discharging team is responsible for following and managing labs/studies that were pending at time of discharge.  | <input type="radio"/> | <input type="radio"/> | <input type="radio"/> | <input type="radio"/> |
| A post-discharge clinic staffed by hospitalists could reduce ED visits.                                              | <input type="radio"/> | <input type="radio"/> | <input type="radio"/> | <input type="radio"/> |
| A post-discharge clinic staffed by hospitalists could reduce readmissions.                                           | <input type="radio"/> | <input type="radio"/> | <input type="radio"/> | <input type="radio"/> |
| A post-discharge clinic might interfere with an established therapeutic relationship between PCP and family/patient. | <input type="radio"/> | <input type="radio"/> | <input type="radio"/> | <input type="radio"/> |

|                                                                                                                                                    | Strongly Agree        | Agree                 | Disagree              | Strongly Disagree     | Unsure                |
|----------------------------------------------------------------------------------------------------------------------------------------------------|-----------------------|-----------------------|-----------------------|-----------------------|-----------------------|
| Primary Care Practices are responsible for managing adverse events following discharge from the hospital                                           | <input type="radio"/> |
| Primary Care providers are responsible for addressing the results of pending studies that were ordered while the patient was in the hospital or ED | <input type="radio"/> |
| The discharging team is responsible to manage adverse patient events that occur between discharge and PCP follow up.                               | <input type="radio"/> |
| I would refer patients to the post-discharge clinic to help me manage patients recently discharged patients.                                       | <input type="radio"/> |
| I feel comfortable managing complicated patients who were discharged on supplemental oxygen.                                                       | <input type="radio"/> |
| I feel comfortable managing complicated patients who were discharged with supplemental tube feeds.                                                 | <input type="radio"/> |

In the past year please estimate the number of patients you have referred to the post-discharge clinic.

\_\_\_\_\_

**Open-Ended Questions - Primary Care Providers**

Do you see value in hospitalists seeing some of your patients whom they discharge in follow up from the hospital?

---

If yes, why?  
If no, why not?

Do you see yourself using more telehealth in post-charge care as a result of the COVID-19 pandemic?

---

Do you think there is any benefit of offering post-hospitalization telehealth to patients post-discharge?

---

If so, who should do this, hospitalists or PCPs or shared responsibility?

**Open-Ended Questions - Hospital-Based Providers**

Overall, what do you think is/are the benefits of telehealth in post-discharge care?

\_\_\_\_\_

Increased use of telemedicine by PCP's, will reduce the need of a post-discharge clinic to provide post-hospitalization care?

\_\_\_\_\_

If PCPs use telehealth, it will decrease their need to provide post-discharge care?

\_\_\_\_\_

**Follow-up telephone interview**

May we contact you for a brief telephone interview about your responses?

- Yes
- No

If you agree, we ask that you provide your name and contact information (email address) so we may schedule a time to call you if you are selected for a follow-up interview.

Your personal information will not be distributed in any way based on your participation in any part of this study.

---

Name \_\_\_\_\_

---

Email address \_\_\_\_\_

---

Phone number \_\_\_\_\_
